# Supplementary material for: Transcriptional markers of sub-optimal nutrition in developing Apis mellifera nurse workers
Source: PubMed Central journal article supplement (PMC3933195; doi:10.1186/1471-2164-15-134), 2014-02-15
Supplement: 1471-2164-15-134-S1.pdf [file 1471-2164-15-134-S1.pdf]

Table S1. Genes up-regulated when bees are starved of pollen in Ament *et al.* 2011 and Alaux *et al.* 2011

| biological process GO term | description                                                 |
|----------------------------|-------------------------------------------------------------|
| GO:0000003                 | reproduction                                                |
| GO:0000226                 | microtubule cytoskeleton organization                       |
| GO:0000902                 | cell morphogenesis                                          |
| GO:0000910                 | cytokinesis                                                 |
| GO:0001700                 | embryonic development via the syncytial blastoderm          |
| GO:0001745                 | compound eye morphogenesis                                  |
| GO:0002165                 | instar larval or pupal development                          |
| GO:0006139                 | nucleobase-containing compound metabolic process            |
| GO:0006259                 | DNA metabolic process                                       |
| GO:0006325                 | chromatin organization                                      |
| GO:0006351                 | transcription, DNA-templated                                |
| GO:0006355                 | regulation of transcription, DNA-templated                  |
| GO:0006357                 | regulation of transcription from RNA polymerase II promoter |
| GO:0006366                 | transcription from RNA polymerase II promoter               |
| GO:0006396                 | RNA processing                                              |
| GO:0006397                 | mRNA processing                                             |
| GO:0006464                 | cellular protein modification process                       |
| GO:0006468                 | protein phosphorylation                                     |
| GO:0007010                 | cytoskeleton organization                                   |
| GO:0007049                 | cell cycle                                                  |
| GO:0007067                 | mitosis                                                     |
| GO:0007154                 | cell communication                                          |
| GO:0007163                 | establishment or maintenance of cell polarity               |
| GO:0007165                 | signal transduction                                         |
| GO:0007264                 | small GTPase mediated signal transduction                   |
| GO:0007265                 | Ras protein signal transduction                             |
| GO:0007267                 | cell-cell signaling                                         |
| GO:0007275                 | multicellular organismal development                        |
| GO:0007399                 | nervous system development                                  |
| GO:0007409                 | axonogenesis                                                |
| GO:0007411                 | axon guidance                                               |
| GO:0007423                 | sensory organ development                                   |
| GO:0007444                 | imaginal disc development                                   |
| GO:0007455                 | eye-antennal disc morphogenesis                             |
| GO:0007476                 | imaginal disc-derived wing morphogenesis                    |
| GO:0007498                 | mesoderm development                                        |
| GO:0007517                 | muscle organ development                                    |
| GO:0007552                 | metamorphosis                                               |
| GO:0008283                 | cell proliferation                                          |
| GO:0008361                 | regulation of cell size                                     |
| GO:0009266                 | response to temperature stimulus                            |
| GO:0009408                 | response to heat                                            |
| GO:0009790                 | embryo development                                          |

|            |                                                    |
|------------|----------------------------------------------------|
| GO:0009792 | embryo development ending in birth or egg hatching |
| GO:0009888 | tissue development                                 |
| GO:0009987 | cellular process                                   |
| GO:0010468 | regulation of gene expression                      |
| GO:0016055 | Wnt signaling pathway                              |
| GO:0019222 | regulation of metabolic process                    |
| GO:0022008 | neurogenesis                                       |
| GO:0030036 | actin cytoskeleton organization                    |
| GO:0030154 | cell differentiation                               |
| GO:0030707 | ovarian follicle cell development                  |
| GO:0035220 | wing disc development                              |
| GO:0040007 | growth                                             |
| GO:0042127 | regulation of cell proliferation                   |
| GO:0048477 | oogenesis                                          |
| GO:0048749 | compound eye development                           |
| GO:0048812 | neuron projection morphogenesis                    |
| GO:0051276 | chromosome organization                            |
| GO:0051726 | regulation of cell cycle                           |
