# Supplementary material for: Transcriptional markers of sub-optimal nutrition in developing Apis mellifera nurse workers
Source: PubMed Central journal article supplement (PMC3933195; doi:10.1186/1471-2164-15-134), 2014-02-15
Supplement: 1471-2164-15-134-S2.pdf [file 1471-2164-15-134-S2.pdf]

Table S2. Genes down-regulated when bees are starved of pollen in Ament *et al.* 2011 and Alaux *et al.* 2011

| biological process GO term | description                                       |
|----------------------------|---------------------------------------------------|
| GO:0006099                 | tricarboxylic acid cycle                          |
| GO:0006119                 | oxidative phosphorylation                         |
| GO:0006413                 | translational initiation                          |
| GO:0006520                 | cellular amino acid metabolic process             |
| GO:0006626                 | protein targeting to mitochondrion                |
| GO:0006629                 | lipid metabolic process                           |
| GO:0006631                 | fatty acid metabolic process                      |
| GO:0006635                 | fatty acid beta-oxidation                         |
| GO:0006807                 | nitrogen compound metabolic process               |
| GO:0007005                 | mitochondrion organization                        |
| GO:0008152                 | metabolic process                                 |
| GO:0009056                 | catabolic process                                 |
| GO:0009058                 | biosynthetic process                              |
| GO:0009156                 | ribonucleoside monophosphate biosynthetic process |
| GO:0009165                 | nucleotide biosynthetic process                   |
| GO:0015986                 | ATP synthesis coupled proton transport            |
| GO:0015992                 | proton transport                                  |
| GO:0044237                 | cellular metabolic process                        |
| GO:0045454                 | cell redox homeostasis                            |
| GO:0046034                 | ATP metabolic process                             |
