# Supplementary material for: Transcriptional markers of sub-optimal nutrition in developing Apis mellifera nurse workers
Source: PubMed Central journal article supplement (PMC3933195; doi:10.1186/1471-2164-15-134), 2014-02-15
Supplement: 1471-2164-15-134-S9.pdf [file 1471-2164-15-134-S9.pdf]

Table S6. Biological process gene ontology (GO) terms that were up-regulated in bees deprived of pollen in Alaux *et al.* (2011), Ament *et al.* (2011), and the present study.

| BP GO term | description                                                 |
|------------|-------------------------------------------------------------|
| GO:0000003 | reproduction                                                |
| GO:0000226 | microtubule cytoskeleton organization                       |
| GO:0000902 | cell morphogenesis                                          |
| GO:0000910 | cytokinesis                                                 |
| GO:0001700 | embryonic development via the syncytial blastoderm          |
| GO:0001745 | compound eye morphogenesis                                  |
| GO:0002165 | instar larval or pupal development                          |
| GO:0006139 | nucleobase-containing compound metabolic process            |
| GO:0006259 | DNA metabolic process                                       |
| GO:0006325 | chromatin organization                                      |
| GO:0006351 | transcription, DNA-templated                                |
| GO:0006355 | regulation of transcription, DNA-templated                  |
| GO:0006357 | regulation of transcription from RNA polymerase II promoter |
| GO:0006366 | transcription from RNA polymerase II promoter               |
| GO:0006396 | RNA processing                                              |
| GO:0006397 | mRNA processing                                             |
| GO:0006464 | cellular protein modification process                       |
| GO:0006468 | protein phosphorylation                                     |
| GO:0007010 | cytoskeleton organization                                   |
| GO:0007049 | cell cycle                                                  |
| GO:0007067 | mitosis                                                     |
| GO:0007154 | cell communication                                          |
| GO:0007163 | establishment or maintenance of cell polarity               |
| GO:0007165 | signal transduction                                         |
| GO:0007264 | small GTPase mediated signal transduction                   |
| GO:0007265 | Ras protein signal transduction                             |
| GO:0007275 | multicellular organismal development                        |
| GO:0007399 | nervous system development                                  |
| GO:0007409 | axonogenesis                                                |
| GO:0007411 | axon guidance                                               |
| GO:0007423 | sensory organ development                                   |
| GO:0007444 | imaginal disc development                                   |
| GO:0007455 | eye-antennal disc morphogenesis                             |
| GO:0007476 | imaginal disc-derived wing morphogenesis                    |
| GO:0007498 | mesoderm development                                        |
| GO:0007517 | muscle organ development                                    |
| GO:0007552 | metamorphosis                                               |
| GO:0008283 | cell proliferation                                          |
| GO:0008361 | regulation of cell size                                     |
| GO:0009266 | response to temperature stimulus                            |
| GO:0009408 | response to heat                                            |
| GO:0009790 | embryo development                                          |
| GO:0009792 | embryo development ending in birth or egg hatching          |

|            |                                   |
|------------|-----------------------------------|
| GO:0009888 | tissue development                |
| GO:0009987 | cellular process                  |
| GO:0010468 | regulation of gene expression     |
| GO:0016055 | Wnt signaling pathway             |
| GO:0019222 | regulation of metabolic process   |
| GO:0022008 | neurogenesis                      |
| GO:0030036 | actin cytoskeleton organization   |
| GO:0030154 | cell differentiation              |
| GO:0030707 | ovarian follicle cell development |
| GO:0035220 | wing disc development             |
| GO:0040007 | growth                            |
| GO:0042127 | regulation of cell proliferation  |
| GO:0048477 | oogenesis                         |
| GO:0048749 | compound eye development          |
| GO:0048812 | neuron projection morphogenesis   |
| GO:0051276 | chromosome organization           |
| GO:0051726 | regulation of cell cycle          |
