# Supplementary material for: Transcriptional markers of sub-optimal nutrition in developing Apis mellifera nurse workers
Source: PubMed Central journal article supplement (PMC3933195; doi:10.1186/1471-2164-15-134), 2014-02-15
Supplement: 1471-2164-15-134-S10.pdf [file 1471-2164-15-134-S10.pdf]

Table S7. Biological process gene ontology (GO) terms that were up-regulated in bees fed pollen in Alaux *et al.* (2011), Ament *et al.* (2011), and the present study.

| BP GO term | description                                       |
|------------|---------------------------------------------------|
| GO:0006099 | tricarboxylic acid cycle                          |
| GO:0006119 | oxidative phosphorylation                         |
| GO:0006413 | translational initiation                          |
| GO:0006520 | cellular amino acid metabolic process             |
| GO:0006626 | protein targeting to mitochondrion                |
| GO:0006629 | lipid metabolic process                           |
| GO:0006631 | fatty acid metabolic process                      |
| GO:0006635 | fatty acid beta-oxidation                         |
| GO:0006807 | nitrogen compound metabolic process               |
| GO:0007005 | mitochondrion organization                        |
| GO:0008152 | metabolic process                                 |
| GO:0009058 | biosynthetic process                              |
| GO:0009156 | ribonucleoside monophosphate biosynthetic process |
| GO:0009165 | nucleotide biosynthetic process                   |
| GO:0015986 | ATP synthesis coupled proton transport            |
| GO:0015992 | proton transport                                  |
| GO:0044237 | cellular metabolic process                        |
| GO:0045454 | cell redox homeostasis                            |
| GO:0046034 | ATP metabolic process                             |
